# Supplementary material for: Suppression of nbe-miR1919c-5p Expression in Nicotiana benthamiana Enhances Tobacco Curly Shoot Virus and Its Betasatellite Co-Infection
Source: MDPI journal article supplement (doi:10.3390/v12040392), 2020-04-01
Supplement: s1 [file s1]

**Table S1 PCR primers used for TbCSV and TbCSB detections.**

| <b>mRNA primers</b> | <b>Primer sequence (5'-3')</b>          | <b>Brief description</b>            |
|---------------------|-----------------------------------------|-------------------------------------|
| TbCSV-F             | ATGCCTCAGCCAAGAAAACTTTT                 | Amplify <i>AC1</i> (1086 bp) for    |
| TbCSV-R             | TCAACACGACGACGTCTGTTCCC                 | detecting TbCSV                     |
| TbCSB-F             | ATGACAATTAAATACAACAACAAG                | Amplify <i>βC1</i> (357 bp) for [1] |
| TbCSB-R             | TCATACATTAGCTATTGTCCC                   | detecting TbCSB                     |
| Pre1919-F           | CGC <u>GGATCC</u> TCCAAAAATCGAATCGTTCC  | Amplify the precursor of            |
| Pre1919-R           | ACGC <u>GTCGAC</u> GATGAAAACGCCCCCAATAA | miR1919c-5p (200 bp)                |

1. Li, K.; Wu, G.; Li, M.; Ma, M.; Du, J.; Sun, M.; Sun, X.; Qing, L., Transcriptome analysis of *Nicotiana benthamiana* infected by Tobacco curly shoot virus. *Virology* **2018**, 15, (1), 138.
