# Supplementary material for: Suppression of nbe-miR1919c-5p Expression in Nicotiana benthamiana Enhances Tobacco Curly Shoot Virus and Its Betasatellite Co-Infection
Source: MDPI journal article supplement (doi:10.3390/v12040392), 2020-04-01
Supplement: s1 [file s1]

**Table S2 qRT-PCR primers used for miRNA and mRNAs detections.**

| <b>primers</b> | <b>Primer sequence (5'-3')</b>                          |
|----------------|---------------------------------------------------------|
| miR1919c-5p-RT | GTTGGCTCTGGTGCAGGGTCCGAGGTATTCGCACCAGAGCCA<br>ACGGGCGAA |
| miR1919c-5p-qF | CGCGCAGTGTCGCAGATGACT                                   |
| Universal-qR   | GGTGCAGGGTCCGAGGTAT                                     |
| TbCSV-qF       | CGCCGCCGTCTCAACTTCG                                     |
| TbCSV-qR       | GACTGGACCTTACATGGACCTTCAC                               |
| TbCSB-qF       | CGTTGATGTTAAGTTGAAGGAGGAC                               |
| TbCSB-qR       | TCTAAGTTATTGAAATTGAATGGTGGTATG                          |
| Niben007-qF    | TGGAGTTTATTCTGGAAATTAC                                  |
| Niben007-qR    | TAGAAAAAGAGTGAACCTTGAATC                                |
| Niben001-qF    | ACTTGCTTCCACTCCACTTGAT                                  |
| Niben001-qR    | CAGAATAGAAAAAGAGCGAACT                                  |
| UBC-qF         | TTTCGGTCCTGATGATACTCCC                                  |
| UBC-qR         | CACAGAGCAAAGACTGGATTGA                                  |

[1]

1. He, Q.; Peng, J.; Yan, F.; Lin, L.; Lu, Y.; Zheng, H.; Chen, H.; Chen, J., Intron retention and 3' - UTR analysis of Arabidopsis Dicer-like 2 transcripts. 39, (3), 3271-3280.
